# Supplementary material for: Personalized antibiograms for machine learning driven antibiotic selection
Source: PubMed Central journal article supplement (PMC9053259; doi:10.1038/s43856-022-00094-8), 2022-04-08
Supplement: 43856_2022_94_MOESM5_ESM.pdf [file 43856_2022_94_MOESM5_ESM.pdf]

## **Description of Additional Supplementary Files**

**File Name:** Supplementary Data 1

**Description:** Source Data for Figure 4a and 4b

**File Name:** Supplementary Data 2

**Description:** Source Data for Figure 5a and 5b
